# Supplementary material for: Parent perceptions regarding virtual pediatric dental clinics during COVID-19 pandemic: a cross-sectional study
Source: PeerJ. 2023 Aug 14;11:e15289. doi: 10.7717/peerj.15289 (PMC10434104; doi:10.7717/peerj.15289)
Supplement: Supplemental Information 1 [file peerj-11-15289-s001.xlsx]

## Sheet: Video
1.Gender	2.Age	3.Occupation	4.Previous experience with telehealth?	5. In light of the coronavirus pandemic, I would consider future consultations via virtual clinic]	6.The virtual clinic saved me time (travel, work or other commitments)]	7. I was able to access the virtual clinic]	8.I did not have any connection issues	9.I could talk to the clinician as well as met in person	10. I was able to express myself effectively]	11. I could easily hear and talk to the clinician]	12. The system was easy to use]	13. The virtual clinic met my needs]	14. I would use the virtual clinic again]
Female	30-39	Employee	No	definitely agree	definitely agree	definitely agree	definitely agree	definitely agree	definitely agree	definitely agree	definitely agree	definitely agree	definitely agree
Female	<19	Student	Yes	definitely agree	definitely agree	definitely agree	definitely agree	definitely agree	definitely agree	definitely agree	definitely agree	definitely agree	definitely agree
Female	<19	Student	No	definitely agree	definitely agree	definitely agree	definitely agree	definitely agree	definitely agree	definitely agree	definitely agree	definitely agree	definitely agree
Female	20-29	Unemployed	No	disagree	definitely agree	definitely agree	definitely agree	definitely agree	definitely agree	definitely agree	definitely agree	definitely agree	definitely agree
Female	30-39	Employee	No	definitely agree	definitely agree	definitely agree	definitely agree	definitely agree	definitely agree	definitely agree	definitely agree	definitely agree	definitely agree
Female	<19	Student	Yes	definitely agree	definitely agree	definitely agree	definitely agree	definitely agree	definitely agree	definitely agree	definitely agree	definitely agree	definitely agree
Female	30-39	Employee	No	definitely agree	definitely agree	definitely agree	definitely agree	definitely agree	definitely agree	definitely agree	definitely agree	definitely agree	definitely agree
Female	30-39	Student	No	definitely agree	definitely agree	definitely agree	definitely agree	definitely agree	definitely agree	definitely agree	definitely agree	definitely agree	definitely agree
Female	30-39	Student	Yes	definitely agree	definitely agree	definitely agree	definitely agree	definitely agree	definitely agree	definitely agree	definitely agree	definitely agree	definitely agree
Male	30-39	Employee	No	definitely agree	definitely agree	definitely agree	definitely agree	definitely agree	definitely agree	definitely agree	definitely agree	definitely agree	definitely agree
Female	40-49	Employee	No	definitely agree	definitely agree	definitely agree	definitely agree	definitely agree	definitely agree	definitely agree	definitely agree	definitely agree	definitely agree
Male	20-29	Student	Yes	definitely agree	definitely agree	definitely agree	definitely agree	definitely agree	definitely agree	definitely agree	definitely agree	definitely agree	definitely agree
Female	<19	Student	No	definitely agree	definitely agree	definitely agree	definitely agree	definitely agree	definitely agree	definitely agree	definitely agree	definitely agree	definitely agree
Female	20-29	Student	Yes	definitely agree	definitely agree	definitely agree	definitely agree	definitely agree	definitely agree	definitely agree	definitely agree	definitely agree	definitely agree
Female	40-49	Unemployed	No	neither agree or disagree	definitely agree	definitely agree	neither agree or disagree	definitely agree	definitely agree	definitely agree	definitely agree	definitely agree	definitely agree
Male	30-39	Unemployed	Yes	neither agree or disagree	neither agree or disagree	neither agree or disagree	disagree	definitely agree	neither agree or disagree	neither agree or disagree	neither agree or disagree	disagree	neither agree or disagree
Female	30-39	Employee	No	neither agree or disagree	neither agree or disagree	neither agree or disagree	neither agree or disagree	definitely agree	neither agree or disagree	neither agree or disagree	definitely agree	neither agree or disagree	neither agree or disagree
Male	40-49	Employee	No	definitely agree	definitely agree	definitely agree	definitely agree	definitely agree	definitely agree	definitely agree	definitely agree	definitely agree	definitely agree
Female	30-39	Unemployed	No	definitely agree	definitely agree	definitely agree	definitely agree	definitely agree	definitely agree	definitely agree	definitely agree	definitely agree	definitely agree
Female	50-59	Retired	No	neither agree or disagree	definitely agree	definitely agree	neither agree or disagree	definitely agree	definitely agree	definitely agree	definitely agree	definitely agree	definitely agree
Male	50-59	Retired	No	neither agree or disagree	definitely agree	definitely agree	neither agree or disagree	definitely agree	definitely agree	definitely agree	neither agree or disagree	definitely agree	definitely agree
Female	30-39	Employee	No	definitely agree	definitely agree	definitely agree	definitely agree	definitely agree	definitely agree	definitely agree	definitely agree	definitely agree	definitely agree
Male	50-59	Retired	No	definitely agree	definitely agree	definitely agree	definitely agree	definitely agree	definitely agree	definitely agree	definitely agree	definitely agree	definitely agree
Male	30-39	Employee	No	definitely agree	definitely agree	neither agree or disagree	definitely agree	definitely agree	definitely agree	neither agree or disagree	neither agree or disagree	definitely agree	definitely agree
Female	30-39	Unemployed	No	definitely agree	definitely agree	neither agree or disagree	neither agree or disagree	definitely agree	definitely agree	definitely agree	neither agree or disagree	definitely agree	definitely agree
Female	20-29	Unemployed	No	definitely agree	definitely agree	definitely agree	definitely agree	definitely agree	definitely agree	definitely agree	definitely agree	definitely agree	definitely agree
Female	20-29	Employee	No	definitely agree	definitely agree	definitely agree	neither agree or disagree	neither agree or disagree	definitely agree	neither agree or disagree	definitely agree	definitely agree	definitely agree
Male	40-49	Employee	No	definitely agree	definitely agree	definitely agree	definitely agree	definitely agree	definitely agree	definitely agree	definitely agree	definitely agree	definitely agree
Male	30-39	Employee	Yes	definitely agree	definitely agree	definitely agree	definitely agree	definitely agree	definitely agree	definitely agree	definitely agree	definitely agree	definitely agree
Male	50-59	Employee	No	definitely agree	definitely agree	definitely agree	definitely agree	definitely agree	definitely agree	definitely agree	definitely agree	definitely agree	definitely agree
Male	50-59	Employee	No	definitely agree	definitely agree	definitely agree	definitely agree	definitely agree	definitely agree	definitely agree	definitely agree	definitely agree	definitely agree
Male	40-49	Employee	No	definitely agree	definitely agree	definitely agree	definitely agree	definitely agree	definitely agree	definitely agree	definitely agree	definitely agree	definitely agree
Female	30-39	Employee	Yes	definitely agree	definitely agree	definitely agree	definitely agree	definitely agree	definitely agree	definitely agree	definitely agree	definitely agree	definitely agree
Female	<19	Student	No	definitely agree	definitely agree	definitely agree	definitely agree	definitely agree	definitely agree	definitely agree	definitely agree	definitely agree	definitely agree
Female	<19	Student	No	definitely agree	definitely agree	definitely agree	definitely agree	definitely agree	definitely agree	definitely agree	definitely agree	definitely agree	definitely agree
Female	30-39	Unemployed	No	definitely agree	definitely agree	definitely agree	definitely agree	definitely agree	definitely agree	definitely agree	definitely agree	definitely agree	definitely agree
Male	<19	Student	No	neither agree or disagree	definitely agree	definitely agree	definitely agree	definitely agree	definitely agree	definitely agree	definitely agree	definitely agree	definitely agree
Female	30-39	Unemployed	No	definitely agree	definitely agree	definitely agree	definitely agree	definitely agree	definitely agree	definitely agree	definitely agree	definitely agree	definitely agree
Female	30-39	Unemployed	No	definitely agree	definitely agree	definitely agree	definitely agree	definitely agree	definitely agree	definitely agree	definitely agree	definitely agree	definitely agree
Female	40-49	Employee	No	definitely agree	definitely agree	definitely agree	definitely agree	definitely agree	neither agree or disagree	definitely agree	definitely agree	definitely agree	definitely agree
Female	30-39	Unemployed	No	definitely agree	definitely agree	definitely agree	definitely agree	definitely agree	definitely agree	definitely agree	definitely agree	definitely agree	definitely agree
Female	<19	Student	Yes	definitely agree	definitely agree	definitely agree	definitely agree	definitely agree	definitely agree	definitely agree	definitely agree	definitely agree	definitely agree
Female	20-29	Unemployed	Yes	neither agree or disagree	neither agree or disagree	definitely agree	definitely agree	neither agree or disagree	definitely agree	definitely agree	neither agree or disagree	neither agree or disagree	neither agree or disagree
Male	<19	Student	No	definitely agree	definitely agree	definitely agree	definitely agree	definitely agree	definitely agree	definitely agree	definitely agree	definitely agree	definitely agree
Female	<19	Student	No	definitely agree	definitely agree	definitely agree	definitely agree	definitely agree	definitely agree	definitely agree	definitely agree	definitely agree	definitely agree
Male	30-39	Employee	Yes	definitely agree	definitely agree	definitely agree	definitely agree	definitely agree	definitely agree	definitely agree	definitely agree	definitely agree	definitely agree
Male	40-49	Employee	No	definitely agree	definitely agree	definitely agree	definitely agree	definitely agree	definitely agree	definitely agree	definitely agree	definitely agree	definitely agree
Male	40-49	Employee	No	definitely agree	definitely agree	definitely agree	definitely agree	definitely agree	definitely agree	definitely agree	definitely agree	definitely agree	definitely agree
Male	40-49	Employee	No	definitely agree	definitely agree	definitely agree	definitely agree	definitely agree	definitely agree	definitely agree	definitely agree	definitely agree	definitely agree
Male	40-49	Employee	Yes	definitely agree	definitely agree	definitely agree	definitely agree	definitely agree	definitely agree	definitely agree	definitely agree	definitely agree	definitely agree
Male	30-39	Employee	Yes	definitely agree	definitely agree	definitely agree	definitely agree	definitely agree	definitely agree	definitely agree	definitely agree	definitely agree	definitely agree
Male	40-49	Unemployed	No	definitely agree	definitely agree	definitely agree	definitely agree	definitely agree	definitely agree	definitely agree	definitely agree	definitely agree	definitely agree

## Sheet: Phone
Gender	Age	3. Occupation	4. Previous experience with telehealth?	5. In light of the coronavirus pandemic, I would consider future consultations via telephone	6.The Telephone consultations saved me time (travel, work or other commitments)	7.I did not have any phone reception issues	8.I was able to access the Telephone consultations	9.I could talk to the clinician as well as met in person	10.I was able to express myself effectively	11.I could easily hear and talk to the clinician	12.The system was easy to use	13.The Telephone consultations met my needs	14.I would use the Telephone consultations again.
Female	30-39	Employee	No	definitely agree	agree	agree	agree	agree	agree	agree	agree	agree	definitely agree
Female	30-39	Employee	Yes	agree	agree	agree	definitely agree	agree	agree	definitely agree	definitely agree	agree	agree
Female	<19	Employee	No	definitely agree	definitely agree	definitely agree	definitely agree	definitely agree	definitely agree	definitely agree	definitely agree	definitely agree	definitely agree
Female	<19	Unemployed	Yes	definitely agree	definitely agree	definitely agree	definitely agree	definitely agree	definitely agree	definitely agree	definitely agree	definitely agree	definitely agree
Female	<19	Unemployed	Yes	definitely agree	definitely agree	definitely agree	definitely agree	definitely agree	definitely agree	definitely agree	definitely agree	definitely agree	definitely agree
Female	<19	Unemployed	Yes	definitely agree	definitely agree	definitely agree	definitely agree	definitely agree	definitely agree	definitely agree	definitely agree	definitely agree	definitely agree
Female	<19	Unemployed	Yes	definitely agree	definitely agree	definitely agree	definitely agree	definitely agree	definitely agree	definitely agree	definitely agree	definitely agree	definitely agree
Female	30-39	Unemployed	No	agree	agree	agree	agree	agree	agree	agree	agree	agree	agree
Female	30-39	Unemployed	No	agree	agree	agree	agree	agree	agree	agree	agree	agree	agree
Female	30-39	Employee	Yes	definitely agree	definitely agree	definitely agree	definitely agree	definitely agree	definitely agree	definitely agree	definitely agree	definitely agree	definitely agree
Female	30-39	Employee	No	agree	agree	agree	agree	agree	agree	agree	agree	agree	agree
Male	30-39	Employee	No	definitely agree	agree	agree	definitely agree	agree	agree	agree	definitely agree	definitely agree	definitely agree
Female	30-39	Employee	Yes	agree	definitely agree	agree	neither agree or disagree	agree	neither agree or disagree	neither agree or disagree	agree	definitely agree	neither agree or disagree
Male	30-39	Employee	Yes	definitely agree	definitely agree	definitely agree	definitely agree	definitely agree	definitely agree	definitely agree	definitely agree	definitely agree	definitely agree
Female	40-49	Employee	Yes	definitely agree	definitely agree	agree	definitely agree	agree	agree	agree	agree	agree	definitely agree
Female	20-29	Unemployed	No	agree	neither agree or disagree	definitely disagree	agree	agree	neither agree or disagree	agree	agree	agree	definitely agree
Female	40-49	Unemployed	Yes	agree	agree	agree	definitely agree	agree	agree	agree	agree	agree	agree
Female	40-49	Unemployed	Yes	agree	agree	agree	definitely agree	agree	agree	agree	agree	agree	agree
Female	40-49	Employee	No	disagree	agree	neither agree or disagree	agree	agree	agree	definitely agree	definitely agree	neither agree or disagree	agree
Female	<19	Stuent	No	disagree	disagree	agree	agree	agree	agree	agree	agree	agree	disagree
Female	20-29	Unemployed	No	definitely agree	definitely agree	definitely agree	definitely agree	definitely agree	definitely agree	definitely agree	definitely agree	definitely agree	definitely agree
Female	30-39	Stuent	Yes	neither agree or disagree	definitely agree	neither agree or disagree	definitely agree	neither agree or disagree	neither agree or disagree	definitely agree	definitely agree	definitely agree	neither agree or disagree
Female	20-29	Employee	No	agree	agree	agree	agree	agree	agree	agree	definitely agree	agree	definitely agree
Female	30-39	Stuent	No	neither agree or disagree	neither agree or disagree	agree	agree	agree	agree	agree	agree	agree	agree
Female	40-49	Unemployed	No	agree	agree	neither agree or disagree	neither agree or disagree	neither agree or disagree	neither agree or disagree	neither agree or disagree	neither agree or disagree	neither agree or disagree	agree
Female	20-29	Unemployed	No	agree	definitely agree	definitely agree	definitely agree	agree	agree	agree	definitely agree	definitely agree	definitely agree
Female	40-49	Unemployed	No	agree	agree	agree	agree	agree	agree	agree	agree	agree	agree
Male	40-49	Employee	No	agree	agree	agree	agree	agree	agree	agree	agree	agree	agree
Female	30-39	Unemployed	No	agree	definitely agree	definitely agree	agree	agree	agree	agree	neither agree or disagree	agree	agree
Female	50-59	Retired	No	agree	agree	neither agree or disagree	neither agree or disagree	agree	definitely agree	definitely agree	neither agree or disagree	definitely agree	definitely agree
Male	50-59	Retired	No	agree	agree	neither agree or disagree	agree	definitely agree	definitely agree	agree	definitely agree	definitely agree	definitely agree
Female	30-39	Employee	Yes	definitely agree	definitely agree	definitely agree	definitely agree	definitely agree	definitely agree	definitely agree	definitely agree	definitely agree	definitely agree
Female	30-39	Employee	No	agree	agree	neither agree or disagree	agree	agree	definitely agree	definitely agree	agree	neither agree or disagree	agree
Female	30-39	Employee	Yes	definitely agree	definitely agree	definitely agree	definitely agree	definitely agree	definitely agree	definitely agree	definitely agree	definitely agree	definitely agree
Female	50-59	Retired	No	agree	agree	neither agree or disagree	neither agree or disagree	neither agree or disagree	agree	agree	neither agree or disagree	agree	agree
Male	40-49	Employee	No	agree	agree	agree	agree	agree	agree	agree	agree	agree	agree
Female	30-39	Unemployed	No	agree	agree	agree	agree	agree	agree	agree	agree	definitely agree	definitely agree
Female	30-39	Employee	No	agree	agree	agree	agree	agree	agree	agree	agree	agree	agree
Female	20-29	Employee	No	agree	agree	agree	agree	agree	agree	agree	agree	agree	agree
Male	40-49	Employee	No	agree	definitely agree	definitely agree	agree	definitely agree	definitely agree	definitely agree	definitely agree	definitely agree	agree
Male	30-39	Unemployed	No	neither agree or disagree	agree	agree	agree	agree	agree	agree	agree	agree	agree
Male	40-49	Employee	No	agree	definitely agree	agree	agree	agree	agree	agree	agree	agree	definitely agree
Male	30-39	Employee	Yes	definitely agree	agree	definitely agree	agree	definitely agree	definitely agree	definitely agree	definitely agree	definitely agree	definitely agree
Male	40-49	Employee	No	agree	definitely agree	agree	agree	definitely agree	agree	definitely agree	definitely agree	agree	definitely agree
Male	30-39	Employee	No	agree	agree	agree	agree	agree	agree	agree	agree	agree	agree
Male	30-39	Employee	No	agree	definitely agree	agree	agree	definitely agree	agree	agree	agree	agree	agree
Male	40-49	Employee	Yes	agree	agree	agree	agree	agree	agree	definitely agree	definitely agree	agree	agree
Male	20-29	Employee	Yes	agree	agree	agree	agree	agree	definitely agree	agree	definitely agree	agree	definitely agree
Male	50-59	Retired	No	agree	agree	agree	agree	agree	agree	definitely agree	definitely agree	agree	definitely agree
Male	40-49	Employee	No	agree	definitely agree	agree	agree	agree	neither agree or disagree	agree	agree	agree	agree
